# Supplementary material for: How a diversity-oriented approach has inspired a new hypothesis for the gabosine biosynthetic pathway. A new synthesis of (+)-gabosine C
Source: Royal Society of Chemistry journal article supplement (doi:10.1039/c3ob41183d), 2013-01-01

Supplementary Information for:

## **How a diversity oriented approach has inspired a new hypothesis for the gabosine biosynthetic pathway. New synthesis of (+)-gabosine C.**

Miguel Ángel Fresneda, Ramon Alibés, Josep Font, Pau Bayón and Marta Figueredo

*Universitat Autònoma de Barcelona, Departament de Química, 08193 Bellaterra, Spain*

*E-mail: [pau.bayon@uab.cat](mailto:pau.bayon@uab.cat)*

### **Table of contents:**

|                                                                                                   |   |
|---------------------------------------------------------------------------------------------------|---|
| <sup>1</sup> H-NMR and <sup>13</sup> C-NMR spectra of compound (+)- <b>4</b> .....                | 2 |
| <sup>1</sup> H-NMR and <sup>13</sup> C-NMR spectra of compound (+)- <b>5</b> .....                | 3 |
| <sup>1</sup> H-NMR and <sup>13</sup> C-NMR spectra of compound (+)- <b>6</b> .....                | 4 |
| <sup>1</sup> H-NMR and <sup>13</sup> C-NMR spectra of compound (+)- <b>gabosine C</b> .....       | 5 |
| <sup>1</sup> H-NMR and <sup>13</sup> C-NMR spectra spectra of compound (+)- <b>7</b> .....        | 6 |
| <sup>1</sup> H-NMR and <sup>13</sup> C-NMR spectra of compound (+)- <b>8</b> .....                | 7 |
| <sup>1</sup> H-NMR and <sup>13</sup> C-NMR spectra of compound (+)- <b>4-epi-gabosine C</b> ..... | 8 |

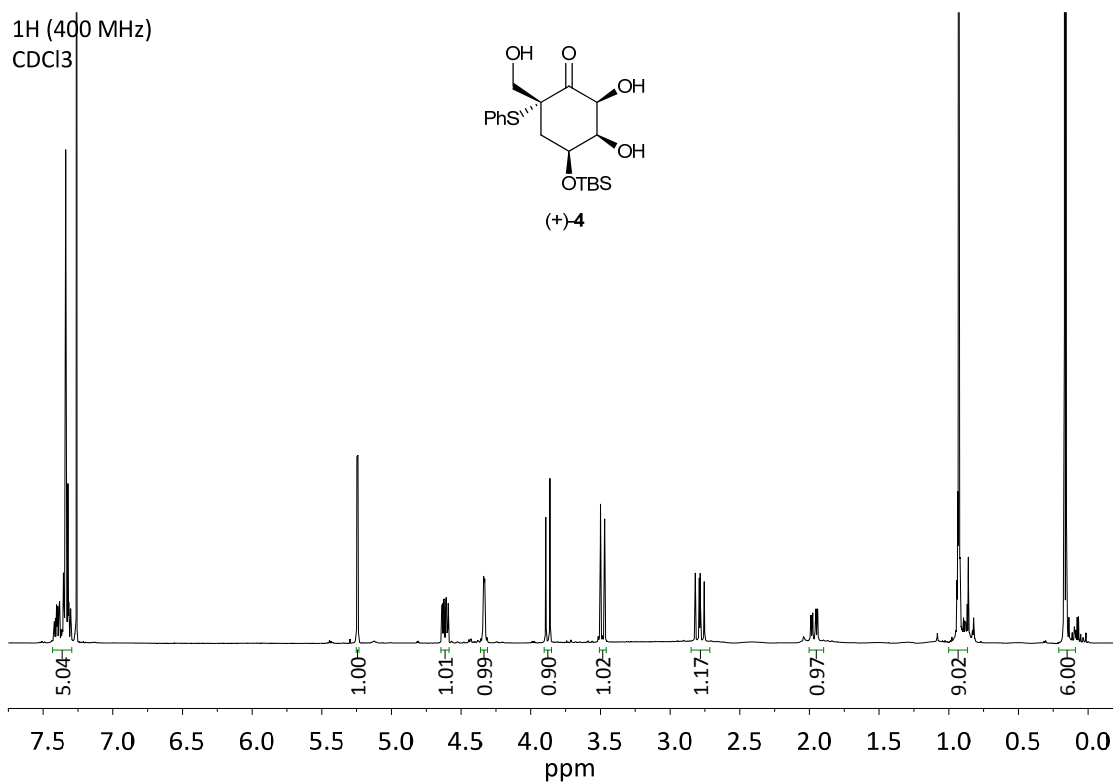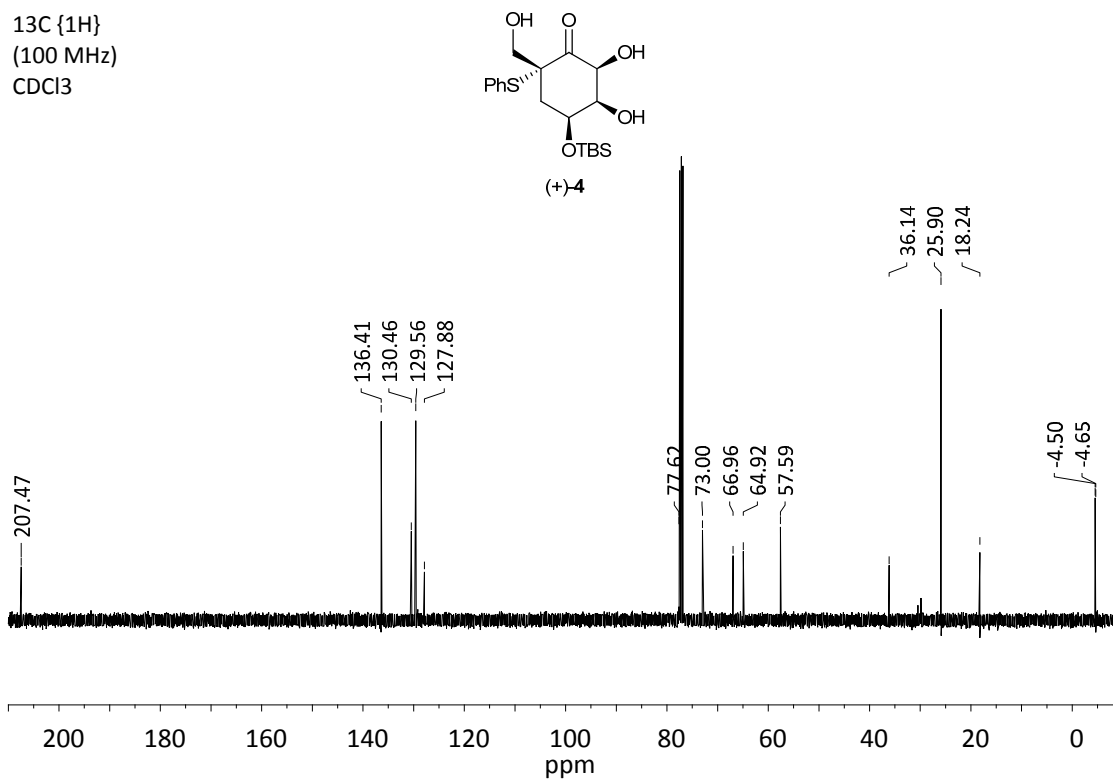

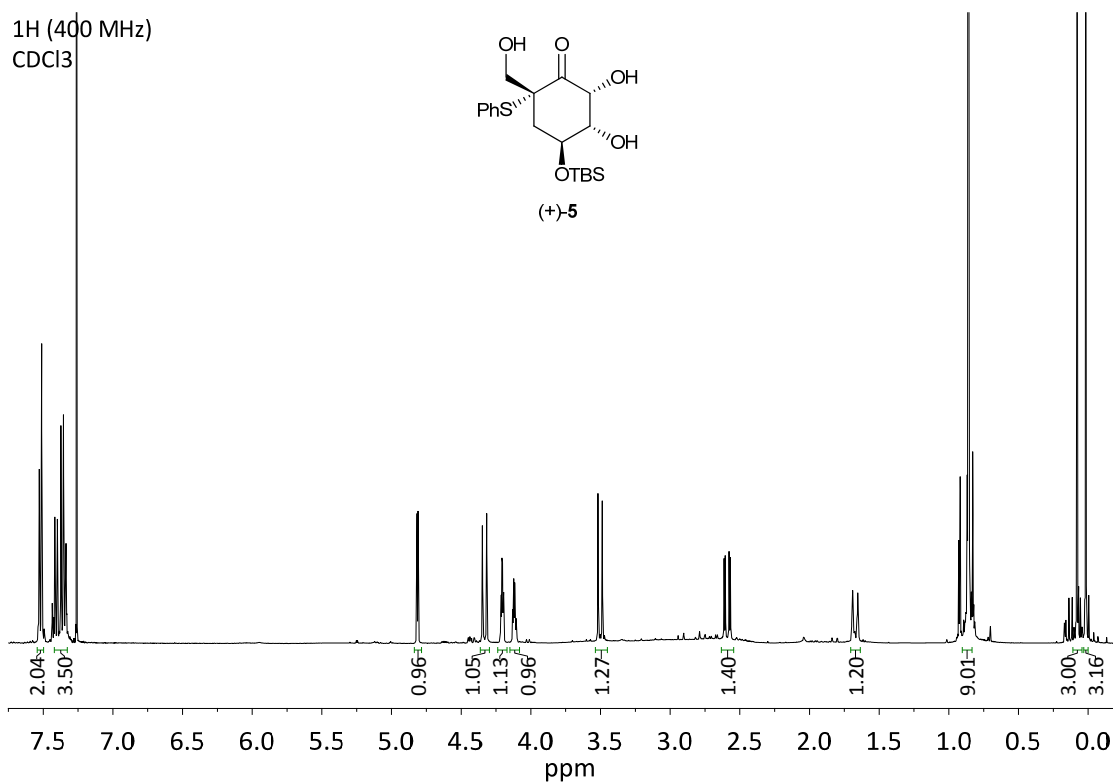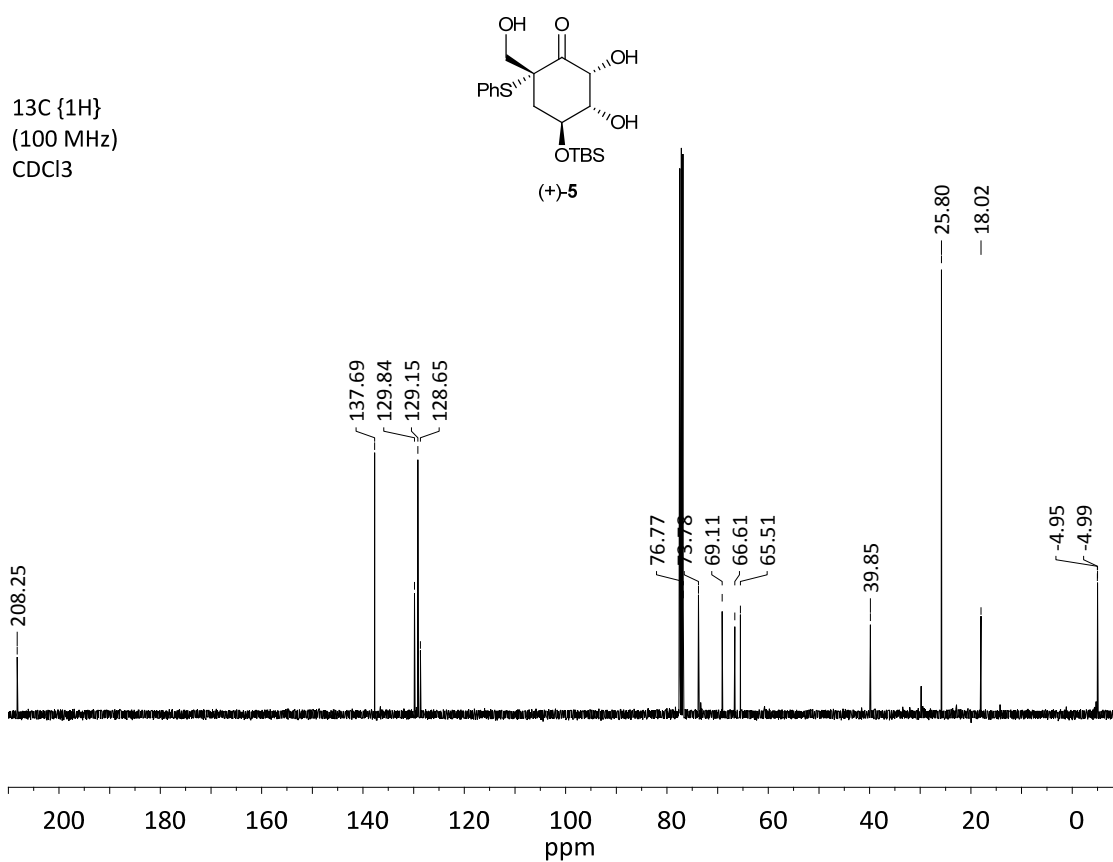

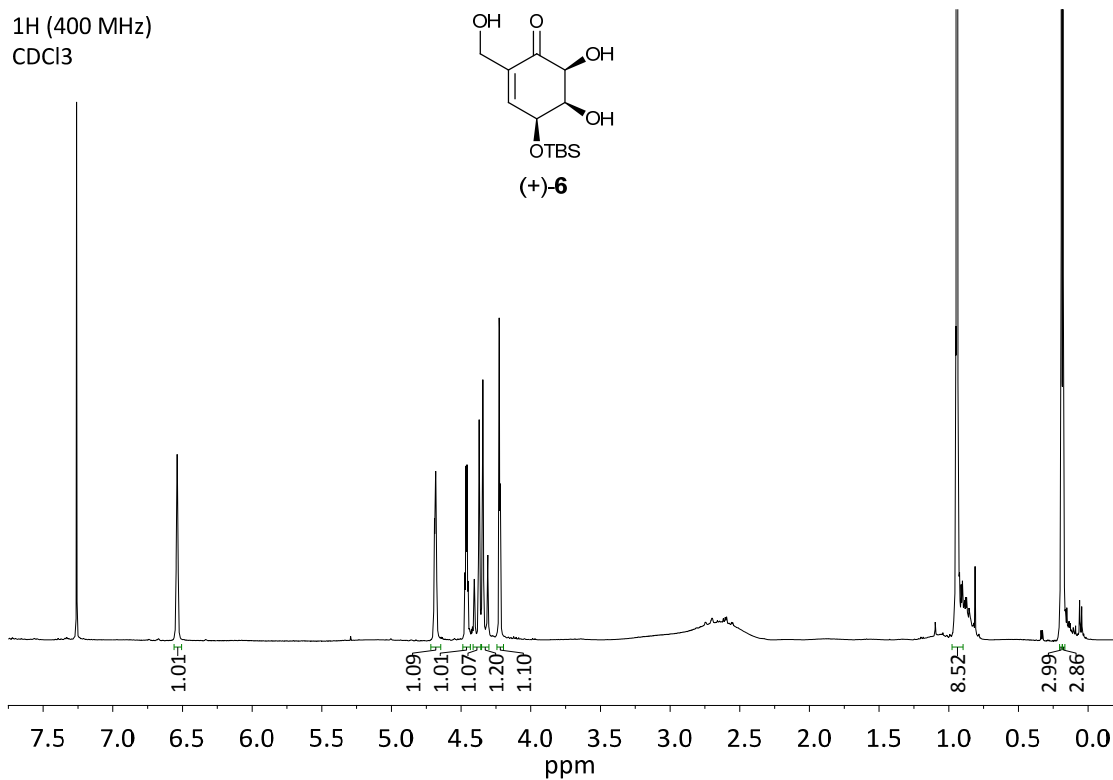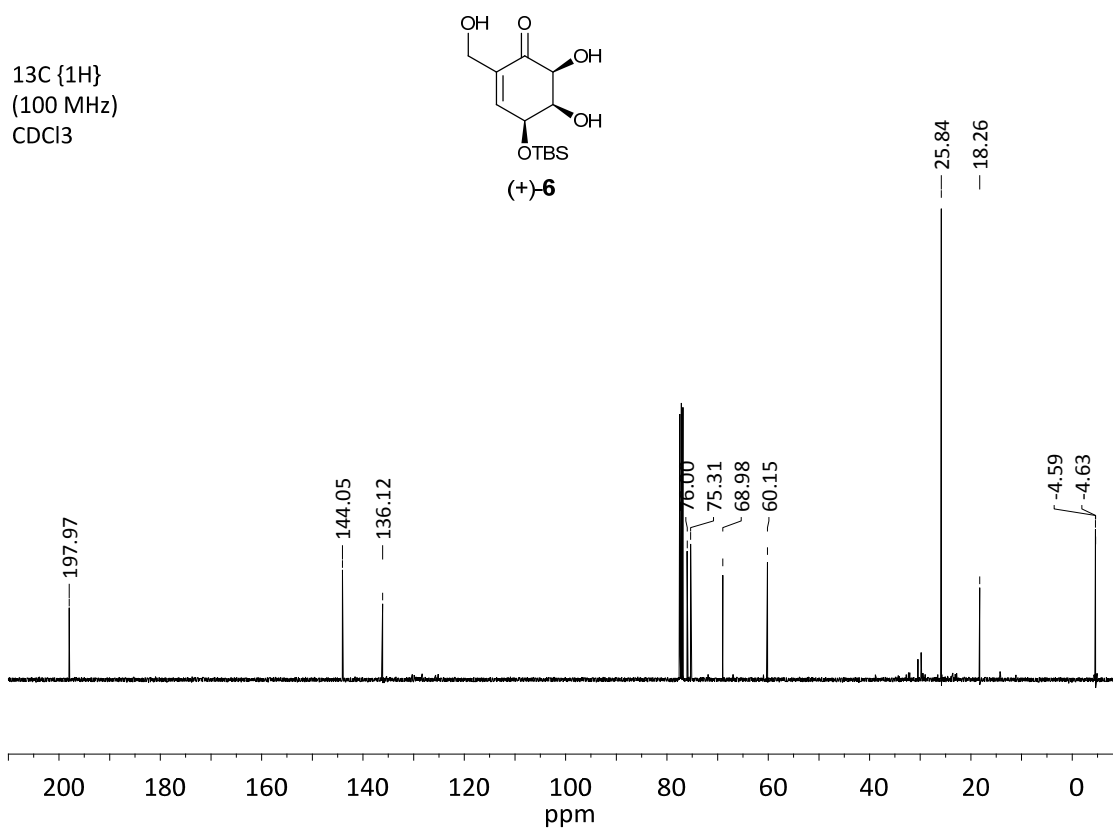

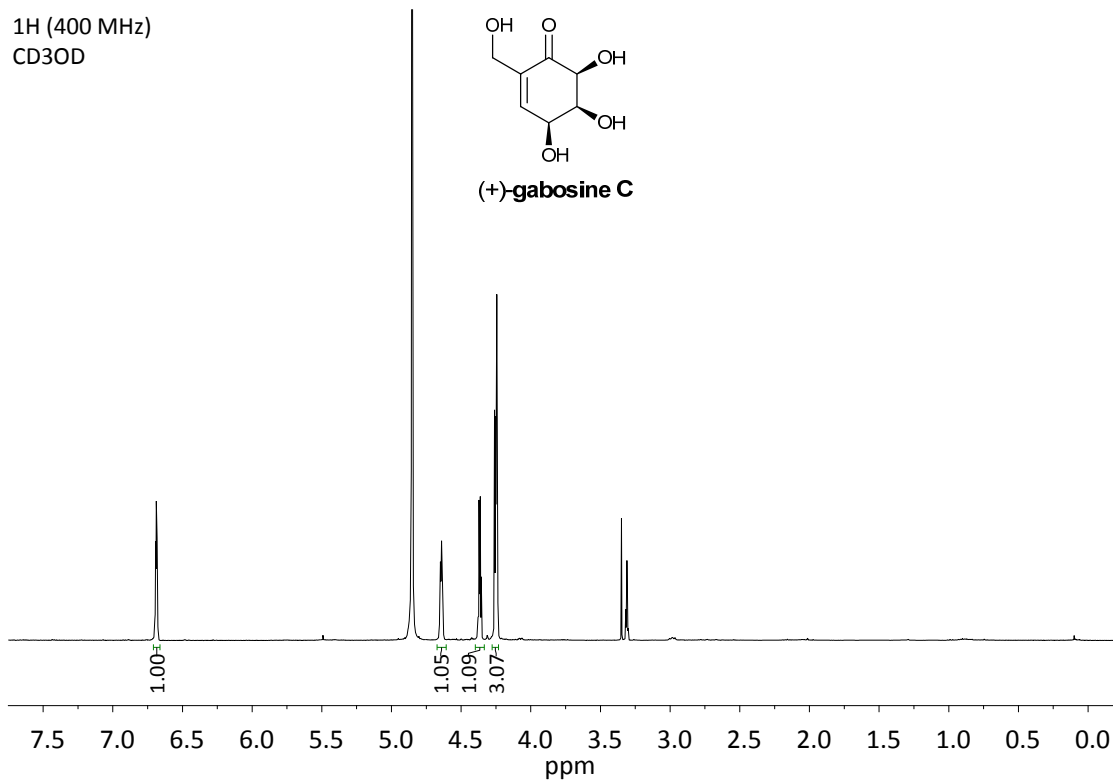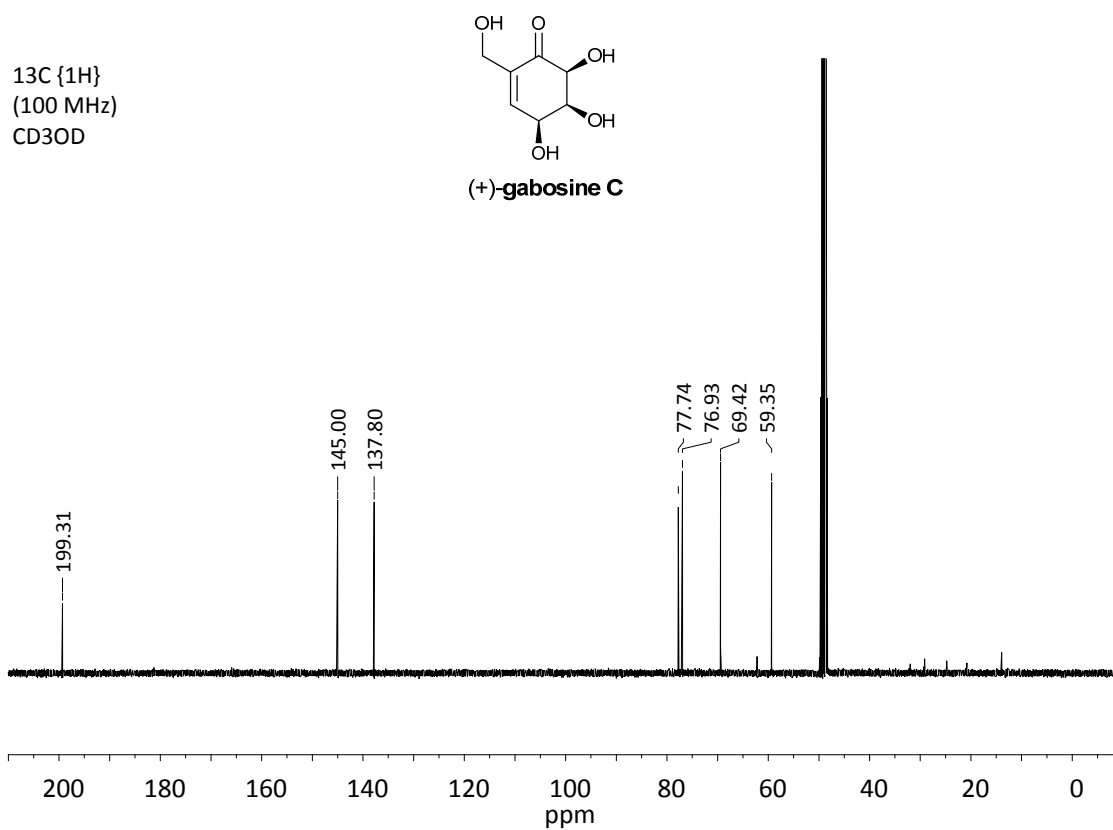

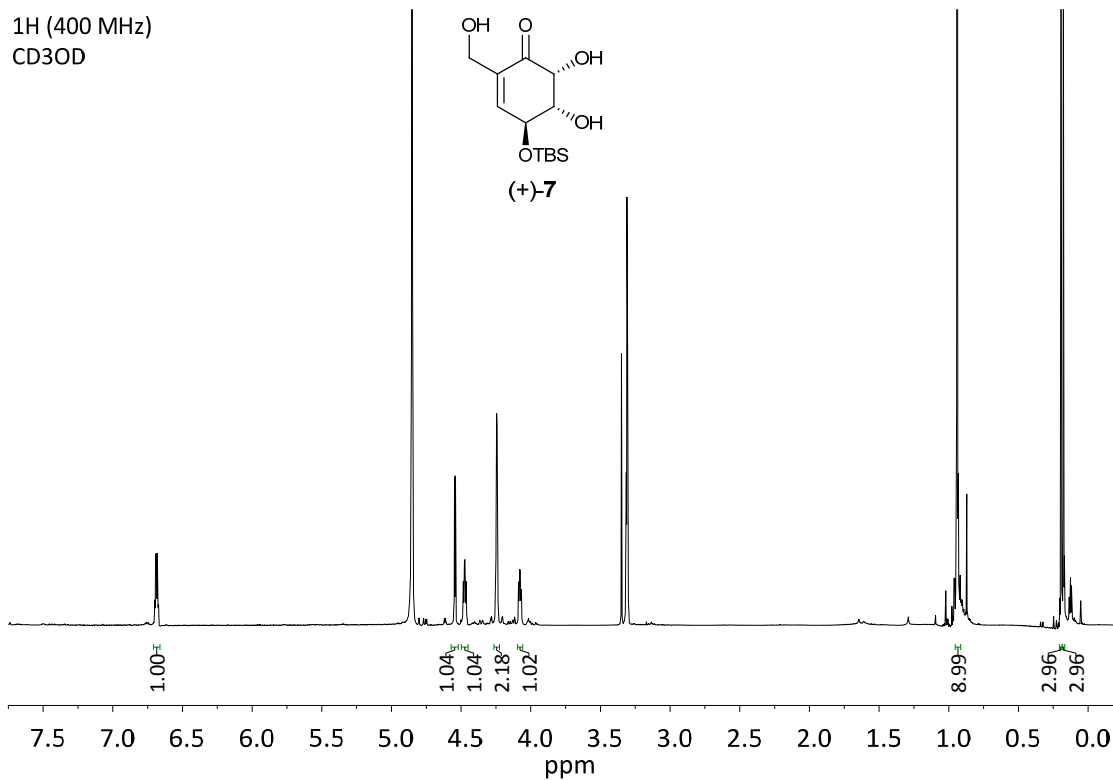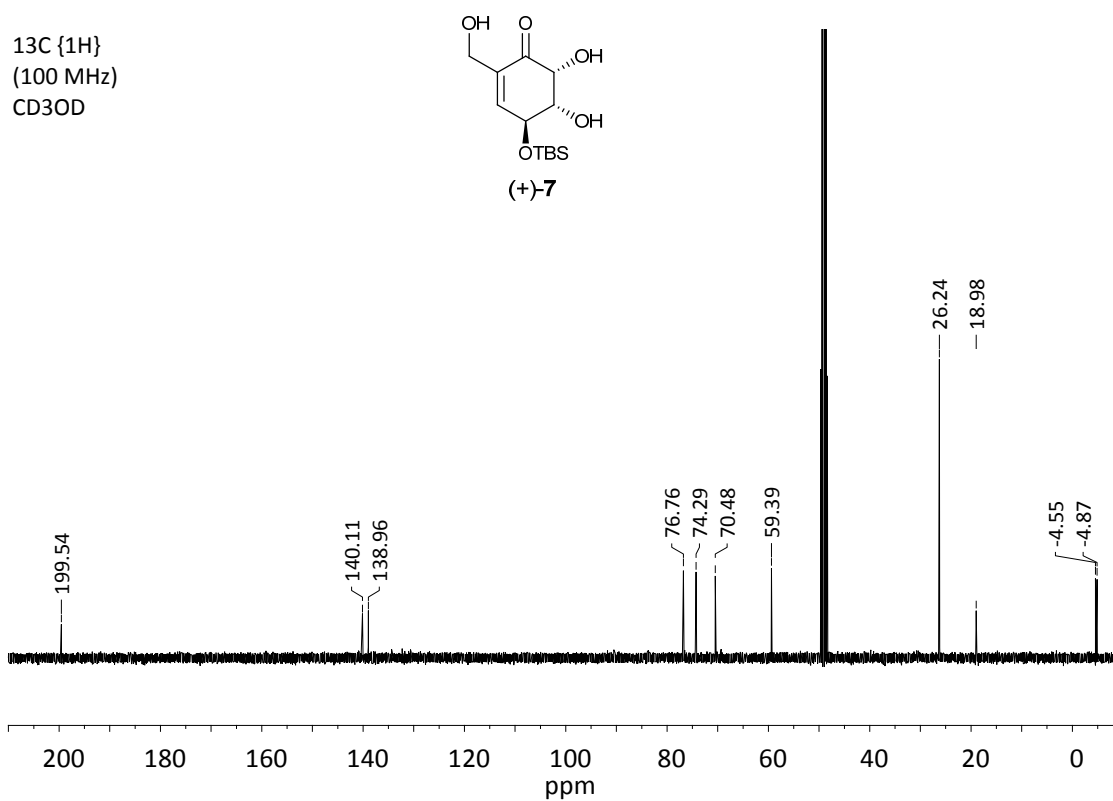

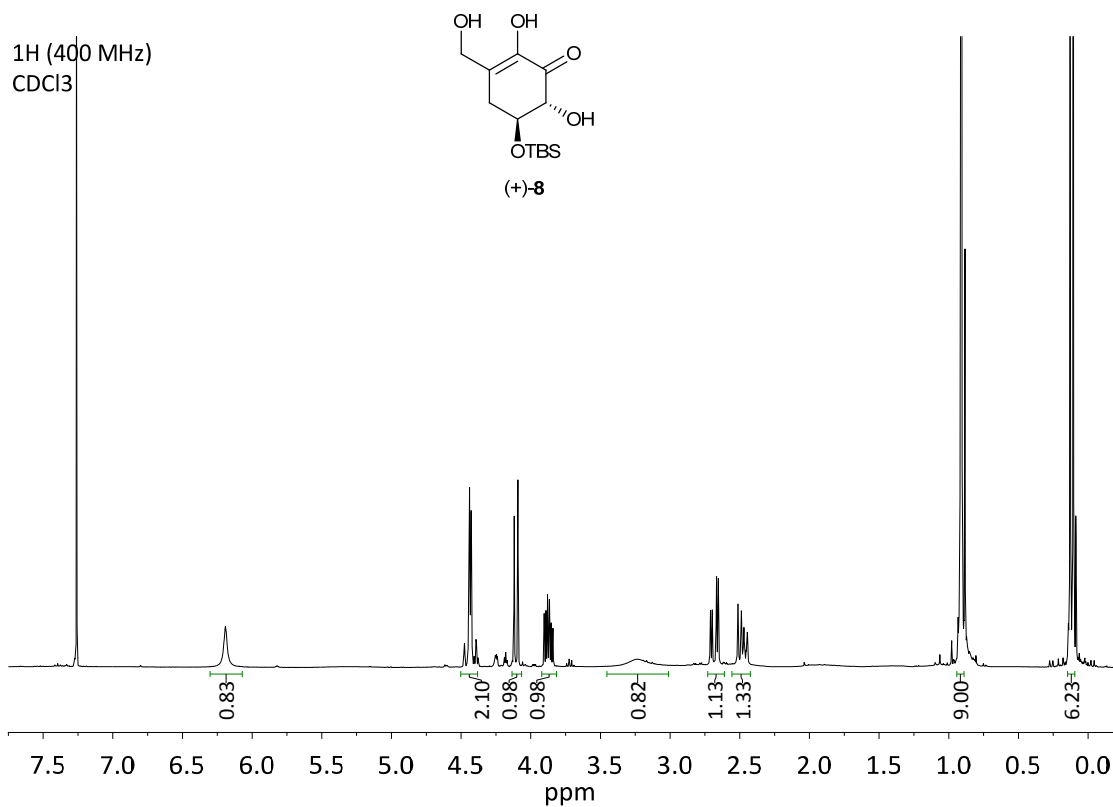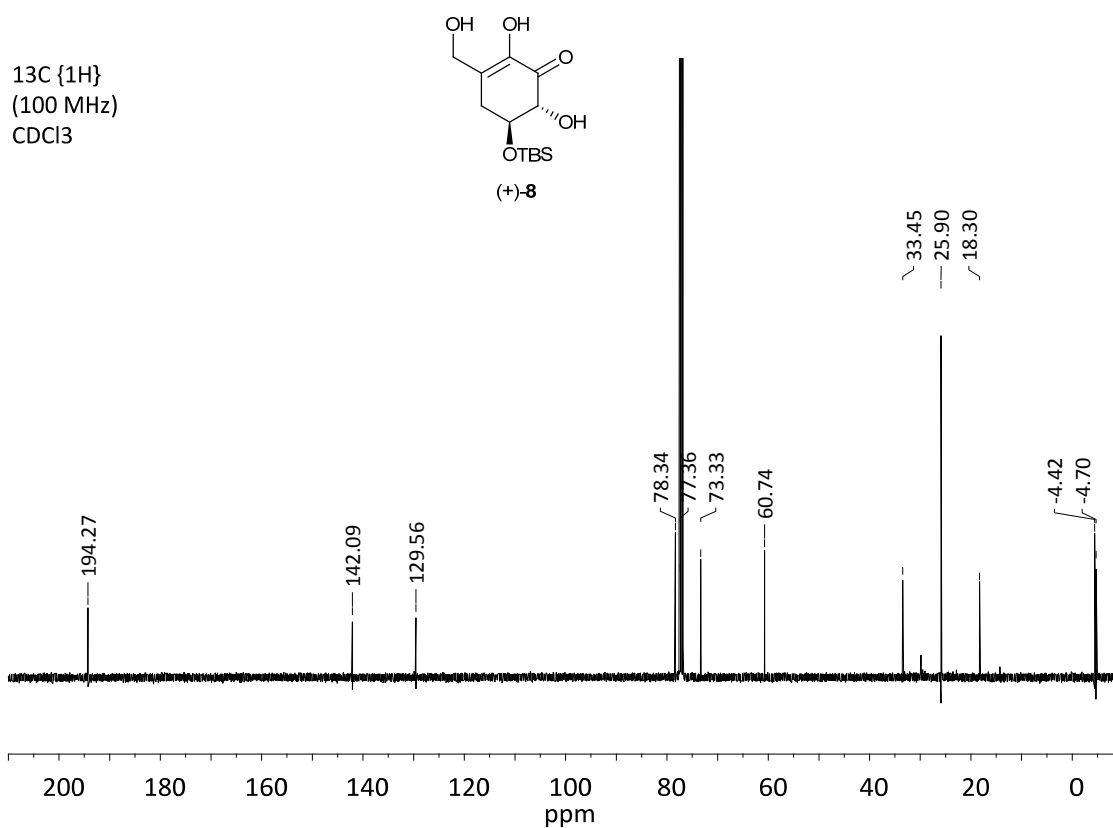

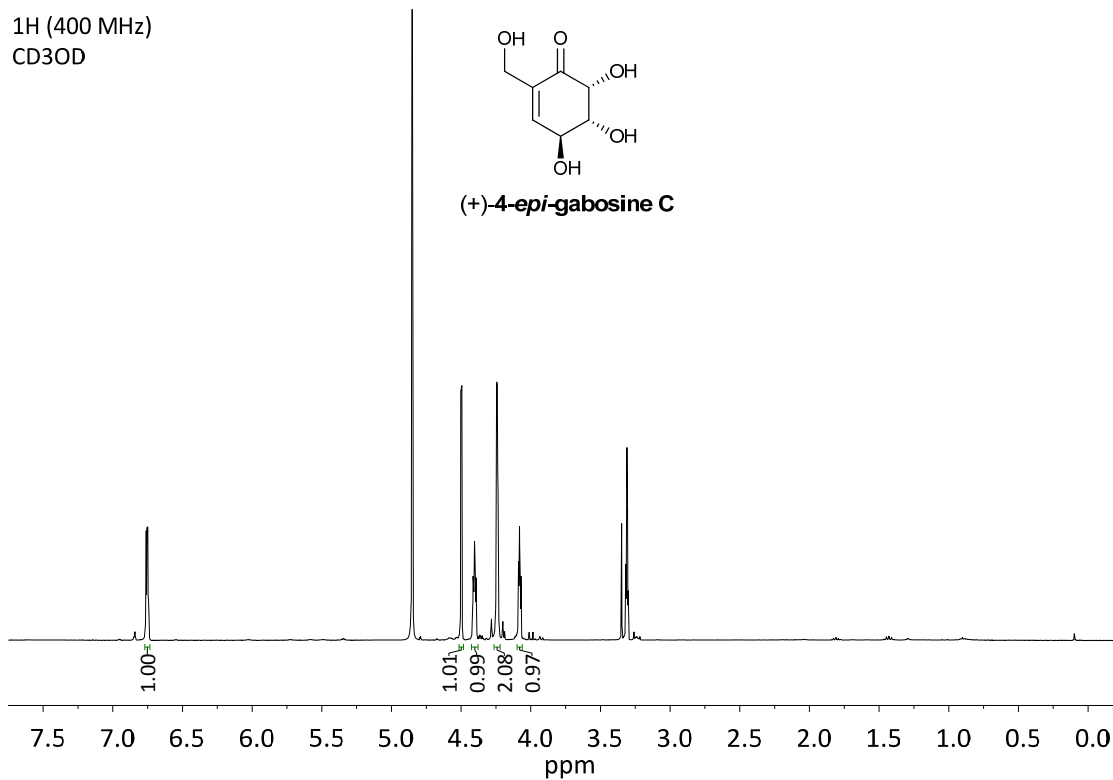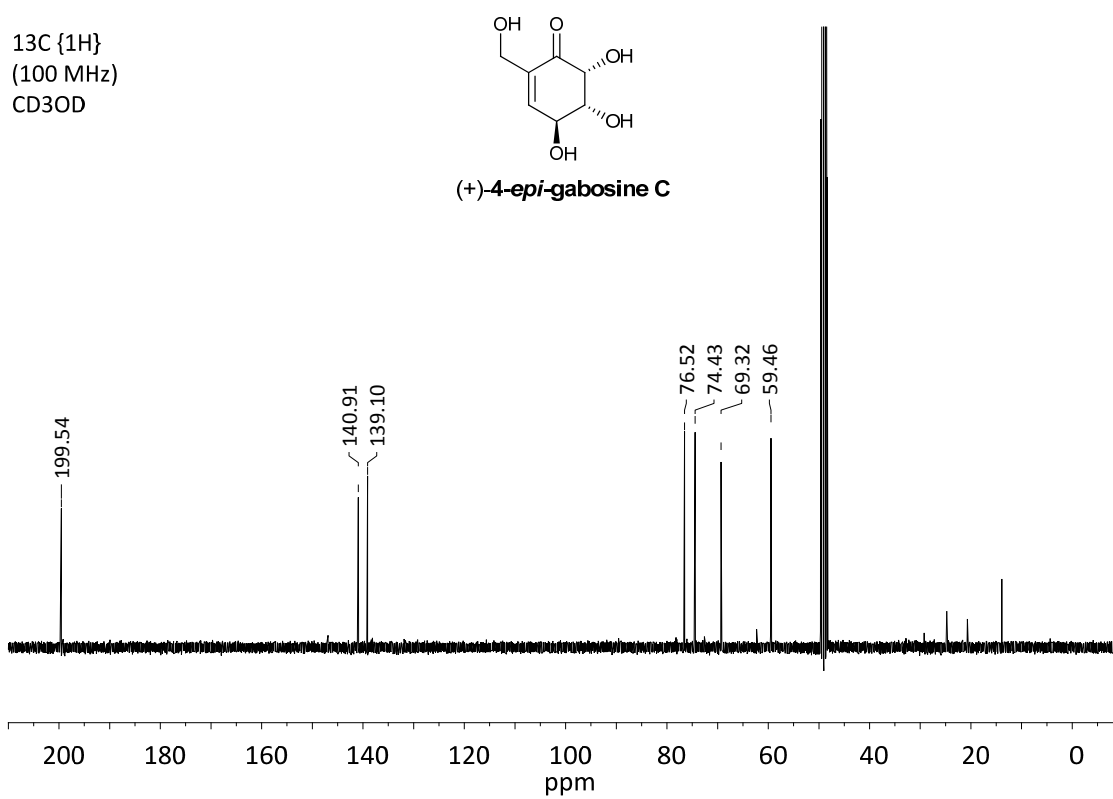

Supplement: c3ob41183d.pdf [file c3ob41183d.pdf]
